# Supplementary material
Source: PubMed Central journal article supplement (PMC543540)
Supplement: jbacter_187_2_611__1.pdf [file jbacter_187_2_611__1.pdf]

Q-L-K-----GRVAA-EIM--TPAIRNLIRE-K-AQ-YS-IQTG-.-GMQT-DQ-L--L---G-I-----A

Ah QTLLKRIGG....GRVAAHEIMMGIPAVRNLIREDKIAQLYSVIQTGM.THGMQTMDSQLKQLVSRGMVAALDAKAK.AVDPNTI  
Av QTLLKRVGG....GRVAAREIMIGTPAIRNLIREDKVAQMYSAIQTTG.SLGMQTLDMALKSLLSRGAIRESAREK.AKIPDSF  
Bb QVLLKQEGG....GRCAAWEIMVGTPAIRNLIREDKIAQMVSSIQTGQ.AHGMQTLDDQALQDILLRKKLISAEQALAY.ADRRSLGL  
Ca QLLKKKDE....SGRIPAFEIMTFTPAVQNLIREGKTHQIQSLIQTGS.KYGMITMDKCIIDLYKKGIISYETAVQS.SVDKEFVTKMLIL  
Cb QLVHKID....GGRIALETMVTNPAIRNLIREDKTYQIESSIQTGS.KYGMKTMDSLAELYKREIISYDTA  
Cd QLLPTADG....KGRIAAIELMFATPAIKNLIREGKTYQIPNMIQTGV.KSGMKTMDQDLMELYKNGKITKDMA  
Cp QLVETVD....GDRNAALEIMVATPAIKNLIREGKTHQIESSIQTGS.KYGMRTMDMELANLYREGIITQETAMNS.AIDREILSRLLMY  
Ct QRLIPDIDN...KGRVAALEIMIVTPAISNLIREGRVAGITSMIQTGA.AQGMKLLDKSIAELYQQGRISKESAYEY.CADRELLKRFIG  
Cv QTLLKTKDGQ...GRVAAHEIMIGTPAIRNLIRENKIAQINSMIQTGQ.QHGMQTLDDQCLADLTRRNIVSPAERAK.ASHKDAF  
Dh QLLPRKD....QQGRVAAQEILVVTPAVRNLIREDKTHQIANTMOTGG.KLGMQSMEKAIQEHVRAGRISNAVAQEM.IQNMGH  
Eca QKLLPAA....QGGRIALYEVLTATAAVSNLIREDKTHQLPGLIQTGA.AAGMOTFEQSYQQRCDGLIS  
Ec QKLEVDK....QEGRVALFELLINTPAVGNLIREDKTHQLPHVIQTGQ.QVGMITFQQSYQHRVGEGR  
Gm QTLLPKASGT...GRVLAIEVMVNPNAIRNLIREDKIHQIYSQMVQVQEKFGMNTMNQCLYGLLQKRHITMDVGMGR.SPDPDELKQMLTSG\*\*  
Gv QTLPADAGSGIQSRCLAQEIMIVTPAIANLIREDKTSQIYSAIQTTG.NLGMKTLETSLRDLYAAGRISYENALAR.TSRPEEFQRIAGAPP\*\*  
Ms QVLLKKRGG....GRVAVHEIMLGTGAIKNLIRENQVAQMYSSIQTGR.KLGMQTLQGLQECIQKGLITREQAYEK.ANVKDQ  
Md QTLLKKNNG....GRVAAHEIMRGTSAIRNLIREDKVAQMYSAIQTTG.AVGMQTMDDQCLADLVERRIISRDVAKEKAKMPDQF  
Ne QALLKTKDGK...GRVAAHEIMIGTPAIRNLIREGKVAQMYSAIQTTG.GVGMQTLDDQNLTDLVKRGVISAVERATK.AMNKDNFRG  
Np QTLLVSKNPKPGEYGRVMAQEILVVTPAISNLIREGKTSQIYSAIQTTG.KLGMQTLQGLADFLYKAGTISFEAAMSK.TSKPDEIQRLIGNST\*\*  
Pf QTLLIKKIGG....GRVAAHEIMLGTSAIRNLIREDKVAQMYSAIQTTG.SLGMQTLDMCLKDLVTKGLISREHAREK.ARTPDFN  
Pp QVLVRRVGG....GRVAAREVLVATPAVRNLIREDGRLAQLSSVMQGG.AEGMLTMEGALRRLRERG.....LIK.GL  
Psy QALLKKVGG....GRVAAHEIMMGTPAIRNLIREDKVAQMYSSIQTGQ.SMGMTLDMCLADLVKKGLITRESARER.AKVPDNF  
Rm QTLLKTRDGN...GRVAAHEIMIATPAIRHLIRENKIAQMYSSMOTSS.GLGMQTLDDQCLSDLIKRGMINYSARAI.AKNPDAFMG  
Sb QKLEADK....LEGRVALFELLINTPATGNLIREDKTHQLPHVIQTGQ.QQGMNT  
So QTLLIKKIGG....GRVAAHEIMMGTPAIRNLIREDKVAQMYSAIQTTG.AHGMQTLQCLQNLVNRGLITREDAMAKSSNKQATF  
St QKLEVDK....QDGRVALFELLINTPATGNLIREDKTHQLPHVIQTGQ.QQGMNTFAQSAQWRQAQGRLLR  
Te QNLVKKTTG....GRCAAHEIMLNTPAIANLIRESKNSQLYSQIQMGA.KLGMQTMEMSLAKLYEKGNTWANAMAK.AVKPDELEALIGPEP\*\*  
Tel QTLLVPPKNPKPGEFGRIMAEIMVTPAISNLIREGKTSQIYSAIQTTG.KLGMQTLQGLVADYRAGIITYEAAMAK.SSRQDELQRLIGSGT\*\*  
Tm QRLVPPKANG...IGFTPILEIMVGTPAVRNLIRENKHLQLESLIQAGA.RHGMVLFDDALVKAALKGEISRESALQF.ARNQEEVARRLGMKPS  
Tte QLIPKKDG....SGRVVATEVMIATPAIRNLIREGKTYQIQSAVQTGG.KFGMITMDMSILHLLKSGVISLEDALTY.CVDQESFSRMI  
Vc QKLLKRVGG....GRVACHEIMLATPAIRNLIREDKVAQMYSSIIQTGA.AHGMQTMQNAKQLIARGVVDAQEVQSKIELDLKAF  
Vp QKLLKRNNG...GRIACHEIMMATPAIRNLIREDKVAQMYSSIIQTGA.AHGMQTMQNAKQLIARGVVDAQEVQSKIELDLKAF  
Vv QKLLKRIGG....GRVACHEIMMATPAIRNLIREDKVAQMYSSIIQTGA.AHGMQTMQNAKQLIARGVVDAQEVQSKIELDLKAF  
Ws QVLIPKIGG....GRVCVPEILIGSPAVGNLIRENKIHQIHSQMMIGQNTGMQTTQVIERLYKERLITKEDAFRY.CFRPEELKIKIL  
Xa QALLKKVGG....GRVAAHEIMVGTPAIRNLIREDKVAQMYSSIQTGQ.QYGMQTLDDQHLQDLVKRSLITRNQAREY.AKDKRIFE  
Xf QMLLKKVGG....GRVAAHEIMVGTPAIRNLIREDKVAQMYSSIQTGQ.QYGMQTLDDQHLQDLIKRNLITRNQAREY.AKDKANF

Alignment of the C-terminal region of a partial list of hypothetical PilT sequences. The following sequences were aligned (organism (strain) accession number): *Aeromonas hydrophila* AAQ95749, *Azotobacter vinelandii* ZP\_00089979, *Bordetella bronchiseptica* CAE31290, *Clostridium acetobutylicum* NP\_348316, *Clostridium botulinum*, *Clostridium difficile*, *Clostridium perfringens* (str.13) BAB81473, *Clostridium thermocellum* (ATCC 27405) ZP\_00314371, *Chromobacterium violaceum* (ATCC 12472) AAQ57858, *Desulfotobacterium hafniense* ZP\_00097939, *Erwinia carotovora* (CAG76524), *Escherichia coli* (K12) AAC75987, *Geobacter metallireducens* ZP\_00079672, *Gloeobacter violaceus* BAC90607, *Magnetococcus sp.* (MC-1) ZP\_00044146, *Microbulbifer degradans* (2-40) ZP\_00316306.1, *Nitrosomonas europaea* (ATCC 19718) NP\_841038, *Nostoc punctiforme* ZP\_00111977, *Pseudomonas fluorescens* (PfO-1) ZP\_00264682, *Pseudomonas putida* (KT2440) NP\_747194, *Pseudomonas syringae* pv. *syringae* (B728a) ZP\_00125143, *Ralstonia metallidurans* (CH34) ZP\_00272985, *Salmonella bongori*, *Shewanella oneidensis* (MR-1) NP\_718905, *Salmonella* serovar Typhimurium (LT2) NP\_462015, *Trichodesmium erythraeum* (IMS101) ZP\_00072816, *Thermosynechococcus elongatus* (BP-1) NP\_680912, *Thermotoga maritima* (MSB8) NP\_229163, *Thermoanaerobacter tengcongensis* NP\_622883, *Vibrio cholerae* (O1 biovar eltor str. N16961) NP\_230116, *Vibrio parahaemolyticus* (RIMD 2210633) NP\_798994, *Vibrio vulnificus* (CMCP6) NP\_760425, *Wolinella succinogenes* NP\_906769, *Xanthomonas axonopodis* (pv. citri str. 306) NP\_643233, *Xylella fastidiosa* (Dixon) ZP\_00039233. Sequences without accession numbers were obtained from the Sanger Institute website ([www.sanger.ac.uk](http://www.sanger.ac.uk)). Sequences were included in the alignment (Clustal W) if they possessed an AIRNLIRE-like motif with greater than 50% identity to the AIRNLIRE consensus sequence. The amino acids of the AIRNLIRE region are shaded black if they are identical in over half of the sequences or grey if they are similar. A consensus sequence is indicated above the alignment, and truncated sequences are marked by asterisks.
